# Insight into the Stability of Cross- $\beta$ Amyloid Fibril from VEALYL Short Peptide with Molecular Dynamics Simulation

Wei Ye<sup>1</sup>, Yue Chen<sup>1</sup>, Wei Wang<sup>1</sup>, Qingfen Yu<sup>1</sup>, Yixue Li<sup>2\*</sup>, Jian Zhang<sup>3\*</sup>, Hai-Feng Chen<sup>1,2\*</sup>

**1** State Key Laboratory of Microbial Metabolism, Department of Bioinformatics and Biostatistics, College of Life Sciences and Biotechnology, Shanghai Jiaotong University, Shanghai, China, **2** Shanghai Center for Bioinformation Technology, Shanghai, China, **3** Department of Pathophysiology, Key Laboratory of Cell Differentiation and Apoptosis of Chinese Ministry of Education, School of Medicine, Shanghai Jiaotong University, Shanghai, China

## Abstract

Amyloid fibrils are found in many fatal neurodegenerative diseases such as Alzheimer's disease, Parkinson's disease, type II diabetes, and prion disease. The VEALYL short peptide from insulin has been confirmed to aggregate amyloid-like fibrils. However, the aggregation mechanism of amyloid fibril is poorly understood. Here, we utilized molecular dynamics simulation to analyse the stability of VEALYL hexamer. The statistical results indicate that hydrophobic residues play key roles in stabilizing VEALYL hexamer. Single point and two linkage mutants confirmed that Val1, Leu4, and Tyr5 of VEALYL are key residues. The consistency of the results for the VEALYL oligomer suggests that the intermediate states might be trimer (3-0) and pentamer(3-2). These results can help us to obtain an insight into the aggregation mechanism of amyloid fibril. These methods can be used to study the stability of amyloid fibril from other short peptides.

**Citation:** Ye W, Chen Y, Wang W, Yu Q, Li Y, et al. (2012) Insight into the Stability of Cross- $\beta$  Amyloid Fibril from VEALYL Short Peptide with Molecular Dynamics Simulation. PLoS ONE 7(5): e36382. doi:10.1371/journal.pone.0036382

**Editor:** Jie Zheng, University of Akron, United States of America

**Received:** February 21, 2012; **Accepted:** March 30, 2012; **Published:** May 10, 2012

**Copyright:** © 2012 Ye et al. This is an open-access article distributed under the terms of the Creative Commons Attribution License, which permits unrestricted use, distribution, and reproduction in any medium, provided the original author and source are credited.

**Funding:** 2012CB721003 <http://www.most.gov.cn/>; 2012AA020403 <http://www.most.gov.cn/>; YG2010MS67 <http://www.sjtu.edu.cn/10ZR1414500>; <http://www.stscm.gov.cn/>; 10PJD010 <http://www.stscm.gov.cn/>; 10PJ1406800 <http://www.stscm.gov.cn/>; 12ZZ023 <http://www.shdrc.gov.cn/>. The funders had no role in study design, data collection and analysis, decision to publish, or preparation of the manuscript.

**Competing Interests:** The authors have declared that no competing interests exist.

\* E-mail: haifengchen@sjtu.edu.cn (HC); yxli@sabit.org (YL); jian.zhang@sjtu.edu.cn (JZ)

† These authors contributed equally to this work.

## Introduction

Amyloid fibrils are found in many fatal diseases, including Alzheimer's disease, Parkinson's disease, type II diabetes, and the transmissible spongiform encephalopathies [1]. These diseases are caused by the aggregation of disordered proteins. Therefore, the aggregation of misfolding protein plays a key role in these diseases [2]. X-ray experiment observes that the product of protein aggregation contains a cross- $\beta$  spine and  $\beta$ -strands perpendicular to the fibril axis [3]. Moreover, the amyloid fibril is noncrystalline and insoluble. That is, it is difficult to crystallize atomic-level structures of cross- $\beta$  spine with traditional experimental methods. Until 2007, Eisenberg's group released a set of crystal structures for amyloid-like fibril of short peptides from different protein precursors by X-ray microcrystallography [3]. These atomic-resolution structures make it possible to investigate the common characters of amyloid formation by molecular dynamics simulations, which can directly compare with experimental results [4].

However, the mechanism of fibril formation is poorly understood. To explain the transition of peptides from soluble to fibrous forms, several types of atomic-level models have been proposed, such as refolding, natively disordered and gain of interaction [3]. Oligomers or intermediate assemblies of protein are identified as the toxic agents that interact with cellular machinery [5–6]. To understand the kinetics of fibril formation and the molecular mechanism of transition from monomers to

fibrils, the growth of amyloid fibrils and the self-assembly of multisubunit protein complexes are studied [7]. The self-assembly includes the stabilization of transient  $\alpha$ -helices through the formation of NMR-invisible helical intermediates and conformational rearrangement from  $\alpha$ -helix to  $\beta$ -sheet [8]. At the same time, there are also some computational studies to provide an insight into the characteristic of the short segments of the amyloid-like aggregation [9,10,11,12,13,14,15,16,17,18,19,20,21,22,23]. Toschi *et al* suggests that electric fields are favorable to the switch of A $\beta$ -peptides from helical to beta-sheet conformational transition [24]. Masman *et al* explores the contributions of the different structural elements of trimeric and pentameric full-length A $\beta$ (1–42) for the aggregation in solution [25]. Kent *et al* reports that a solvent-exposed hydrophobic patch is important for the aggregation of A $\beta$ (10–35) [15]. Zheng *et al* studies A $\beta$ 40 elongation, association, and the aggregation pathway of  $\beta$ 2-microglobulin amyloid with molecular dynamics simulations [26]. Sgourakis *et al* researches the flexibility of C terminus of A $\beta$ 42 which is responsible for the higher propensity to form amyloids [27]. DeMarco and Daggett study the aggregation process of prion fibril using atom molecular dynamics simulations [12]. Wu *et al* reports the time scale of aggregation for amyloidogenic hexapeptide NFGAIL [22]. Wang *et al* studies the disaggregation behaviour of GNNQQNY oligomer [28]. Furthermore, Gnana-karan *et al* investigates the aggregation of simple amyloid  $\beta$ -dimer with replica-exchange molecular dynamics [14]. Lin *et al* reports

the structural stability and aggregation behavior of the VEALYL peptide [29]. These previous works can partly reveal the self-assembly mechanism of amyloid fibril. However, we still do not know if there is an intermediate state during the aggregation of different protein precursors. To shed light on this question, all atom molecular dynamics simulation was used to analyze the aggregation mechanism of VEALYL short peptide.

In our previous work, we use molecular dynamics simulation to investigate the stability of of hexamer for eight class peptides. The MD results suggest that VEALYL and MVGGVV-1 are the most stable ones. Then we study the aggregation mechanism of MVGGVV-1 amyloid fibrils [30]. The results indicate that the study of short peptide aggregation could reveal some common fundamental mechanisms for the fibril formation in large protein systems. Therefore, in this study, we intend to research the stability of VEALYL peptide to understand its aggregation mechanism using room-temperature molecular dynamics simulation in explicit water. The VEALYL hexamer model was shown in Figure 1.

## Results and Discussion

### 1. The stability of VEALYL hexamer

The previous work suggests that a small number of trajectories for MD simulation (5–10) is sufficient to capture the average properties of the protein [31]. Therefore, 10 trajectories of 20.0 ns each were simulated at 298 K to analyze the stability of VEALYL hexamer. The C $\alpha$  atom RMSD for representative trajectory was shown in supplement Figure S1. The RMSD was about 2.5 Å for VEALYL hexamer. This suggests that VEALYL hexamer became dynamics equilibration after 15.0 ns simulation.

To analyze the stability, the C $\alpha$  fluctuations of VEALYL hexamer were illustrated in Figure 2. The figure indicates that all chains have common characteristics of small variation for the five central residues whereas large variation for the two end residues. This suggests that the center residues are more rigid than those in the termini region. This is in agreement with the results of Zheng et al. [32] However, the fluctuation of residues 1–2 was larger than that of residues 5–6 for strands 1 and 3, and the fluctuation for strands 2 and 6 was the reverse. The fluctuation of two termini residues for strands 4 and 5 had no significant difference. According to the asymmetric fluctuation, a little twist was found for beta-strand of VEALYL hexamer peptide during room

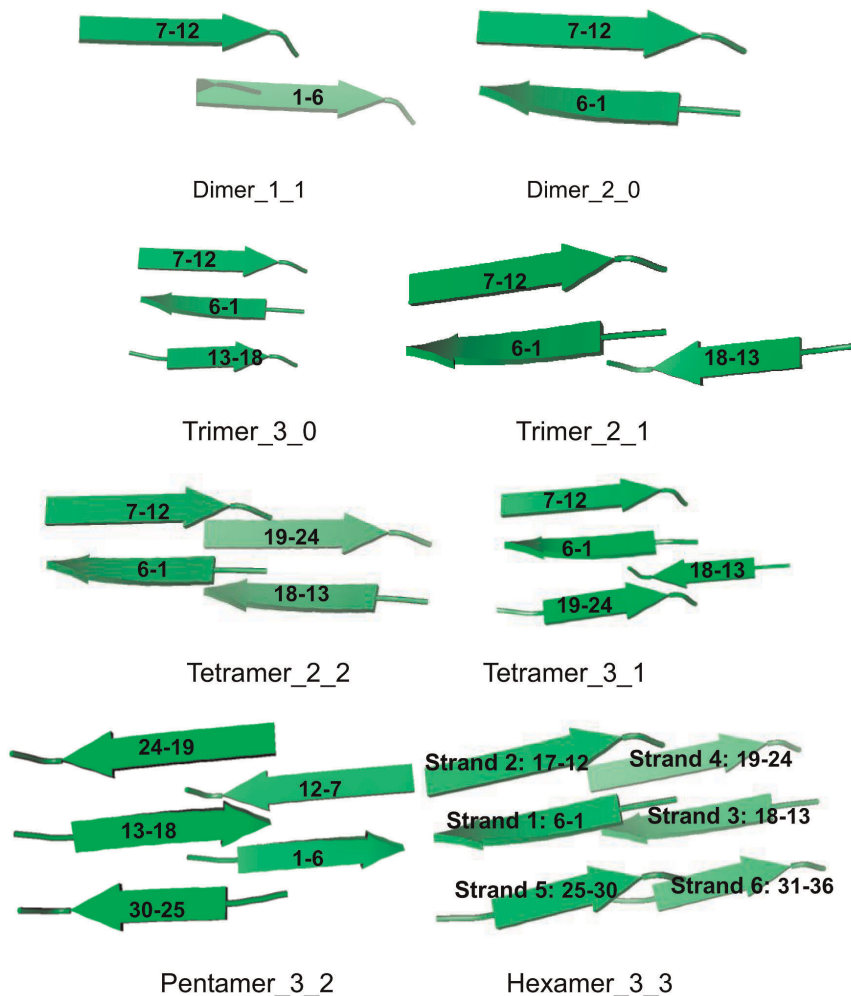

**Figure 1. The schematic organization of dimer, trimer, tetramer, pentamer, and hexamer VEALYL model. The organization of strand is indicated.**

doi:10.1371/journal.pone.0036382.g001

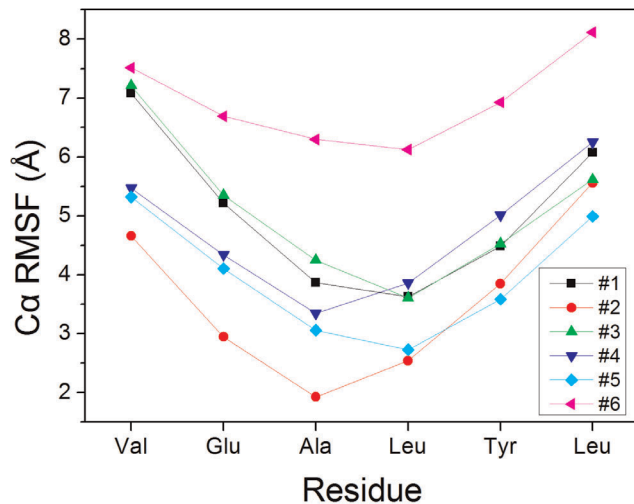

**Figure 2. C $\alpha$  variation of residues for VEALYL hexamer. Each short peptide is monitored, respectively. The fluctuations of six peptides are different.**

doi:10.1371/journal.pone.0036382.g002

temperature simulation. This is consistent with the results of other simulations [25,33].

To further study the driving force for the stability of steric zipper motif, the native contacts and hydrogen bonds for VEALYL hexamer were calculated. A hydrogen bond was assigned if the distance between donor and acceptor atoms was less than 3.5 Å. The populations of hydrogen bond for ten trajectories were shown in Figure 3. 17 stable hydrogen bonds were found, with populations higher than 40%. These hydrogen bonds played key roles in stabilizing the zipper motif. This is consistent with the previous observation that hydrogen bond was found in the 16 peptides of VEALYL [9]. Besides hydrogen bond, we also researched the native contact of VEALYL hexamer. There were two types of native contact. One was the contact of interstrand, and the other was that of intersheet. An intersheet chain contact was defined if the distance between the center mass of two side chains was less than 6.0 Å. The native contacts for intersheet and interstrand were shown in Figure 4. There were 20 and 4 stable native contacts for interstrand and intersheet with populations higher than 40%. The native contacts of interstrand focused on Val1, Leu4, and Tyr5. The native contacts of intersheet focused on Val1 and Leu4. In summary, these native contacts of interstrand and intersheet should be major driving forces for the aggregation of VEALYL peptide.

## 2. Mutant Research

The native contacts for VEALYL hexamer suggest that Val1, Leu4, and Tyr5 are key residues to stabilize the hexamer interface. To confirm the results of statistics analysis on these key residues, these residues were mutated to tiny Gly for each peptide, respectively. According to the distribution of these residues in sequence, mutant research could be classed into two categories: single-point and two linkage residue mutant. For wild type and mutant, some native contacts are between the side chains of two amino acids that are not neighboring in the amino acid sequence. The fraction of native contacts ( $Q_f$ ) was used as a reaction coordinate for measuring the deviation from the native state of structures produced during molecular dynamics simulations. The  $Q_f$  for wild type and mutants was shown in Figure 5. The  $Q_f$  of wild type was larger than 60% and kept constant during 20 ns

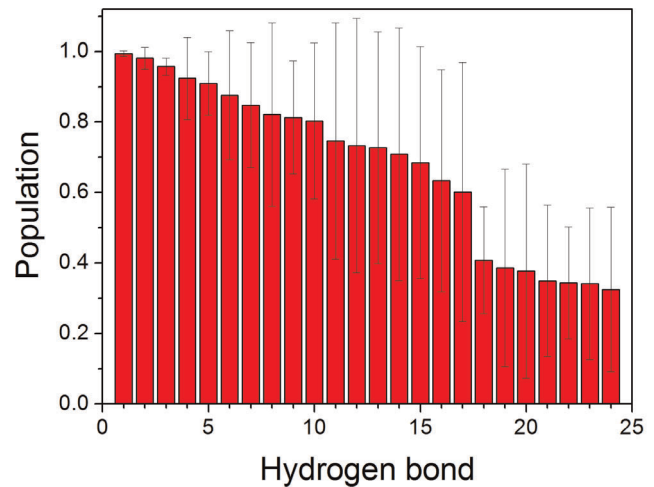

**Figure 3. Hydrogen bond for VEALYL hexamer.** Hydrogen bond was arranged by descending order according to the population. The populations of 17 hydrogen bonds are larger than 40%. doi:10.1371/journal.pone.0036382.g003

simulation. This suggests that the wild type of VEALYL hexamer is very stable. This is consistent with the results of RMSF. For the single-point mutant, the  $Q_f$  of V1G, L4G, and Y5G decreased during 20 ns simulation and is significant lower than that of the wild type, respectively. However, the  $Q_f$  of E2G, A3G, and L6G is larger than that of WT. For two linkage mutant, the  $Q_f$  of A3GL4G was slight higher than that of the wild type. This confirms that Val1, Leu4, and Tyr5 are key residues for the zipper stability.

The distances of interstrand and intersheet for wild type and mutants were shown in Figure 6. The distance of interstrand for WT, A3G, and A3GL4G was about 6 Å, respectively. The distance of interstrand for E2G and L6G was about 5 Å and their variations were very small. The distance of interstrand for V1G, L4G, and Y5G was about 9 Å and significant higher than that of WT. This suggests that the strands of V1G, L4G, and Y5G have the propensity of expansion. The distance of intersheet for WT was between 16 Å and 17 Å. Surprisingly, the distance of intersheet for E2G, A3G, and Y5G decreased relative to WT. The  $\beta$ -sheets have the propensity of compression. This suggests that E2G and A3G might play some roles in the stability of the fibril [29]. On the contrary, the distance of intersheet for V1G and L4G significantly increased. The hexamers of V1G, L4G, and Y5G are almost disaggregation. The mutant of V1G, L4G, and Y5G will lead to the disaggregation of hexamer.

To reveal the structural adjustment for mutants, the interactions between these short peptides were shown in Figure 7. The average native contact of each residue for V1G, L4G, and Y5G is 1.36, 1.57, 1.64, and lower than that of WT (1.95), respectively. This suggests that the mutant of Val1, Leu4, and Tyr5 decreases the native contact between residues. For hydrogen bond, the average number for V1G, L4G, and Y5G was 1.09, 1.05, 0.97, and lower than that of WT (1.11), respectively. The average hydrogen bond for A3G was 1.11 and similar to that of wild type. The average hydrogen bond for E2G, L6G, A3GL4G was 1.23, 1.36, 1.23, and larger than that of WT, respectively. This suggests that the mutant of Val1, Leu4, and Y5G decreases the hydrogen bonds of residue. In summary, Val1, Leu4, and Tyr5 were key residues for VEALYL aggregation combined hydrogen bond and native contact analysis.

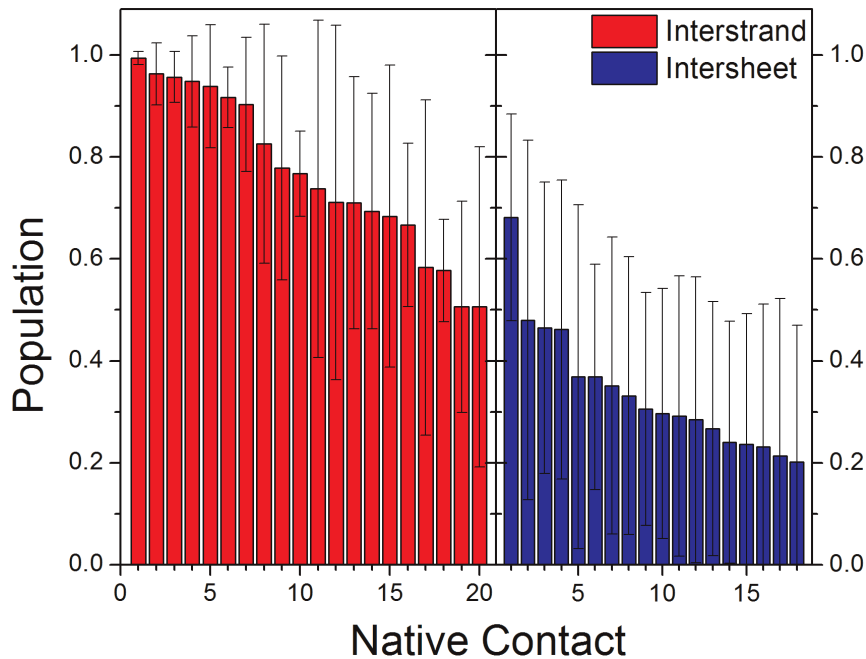

**Figure 4. Native contact of VEALYL hexamer.** Native contact was classed into interstrand and intersheet. Native contact was arranged by descending order according to the population. The native contacts of interstrand are stronger than those of intersheet.  
doi:10.1371/journal.pone.0036382.g004

To study the stability of mutation, C $\alpha$  variations of wild type and mutants were illustrated in supplement Figure S2. The RMSF of V1G was the largest. The RMSF of L4G and Y5G was also higher than that of WT, respectively. The RMSF of A3G and L6G

was similar to that of wild type. The variation order of RMSF for V1G, L4G, and Y5G was consistent with the result of distances for intersheets and interstrands.

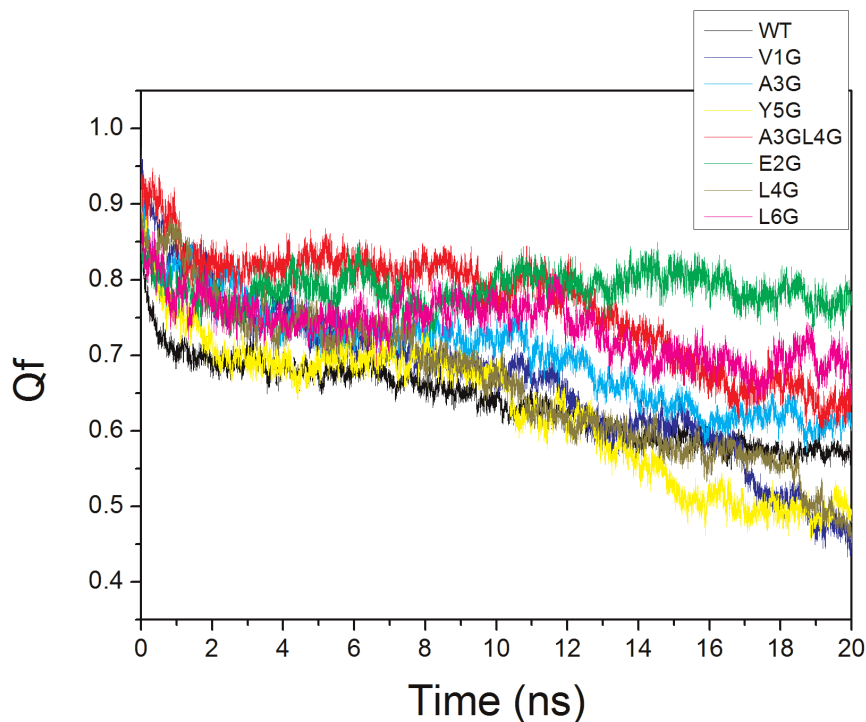

**Figure 5. The fraction of native contact between  $\beta$ -strands for wild type and mutants during the 20 ns MD simulations.** The color code of wild type and mutants (V1G, E2G, A3G, L4G, Y5G, L6G, and A3GL4G) was labeled in the caption.  
doi:10.1371/journal.pone.0036382.g005

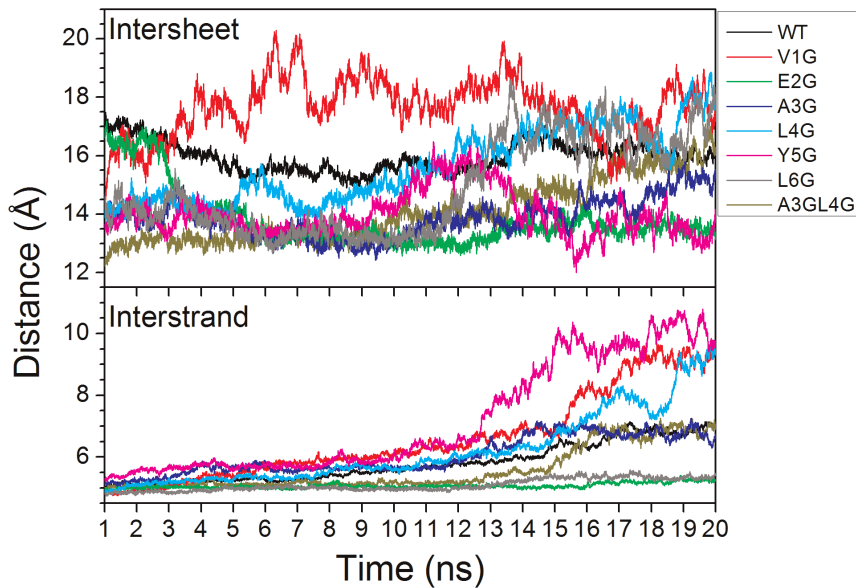

**Figure 6. The average interstrand and intersheet distance between  $\beta$ -strands for wild type and mutants during 10 ns simulation.** The interstrand distance was calculated by averaging pairwise residue  $C\alpha$ - $C\alpha$  distances of strand1-strand2, strand2-strand3, strand4-strand5, and strand5-strand6 within the same  $\beta$ -sheet layer. The intersheet distance was calculated between the  $C\alpha$  center of sheet1 and sheet2. doi:10.1371/journal.pone.0036382.g006

### 3. Comparison for the stability of oligomer

In order to reveal the aggregation kinetics, the stabilities of dimer, trimer, tetramer, and pentamer were studied. The simulation condition was also gathered in Table 1. As shown in supplement Figure S3, the  $C\alpha$  RMSDs quickly increased to 25 Å for dimer (1-1) and  $\sim 10$  Å for dimer (2-0) after 15 ns simulation. This suggests that the dimer is not stable and discards their original organization of structure during 20 ns simulation. This is consistent with the result of Zheng et al that the dimer of

GNNQQNY is not thermodynamically stable state [32]. Their average structures absolutely depart from the initial coordination of dimer. The  $\beta$ -sheet structure of dimer (2-0) also discarded. Then, how about the stability of the trimer with addition a strand based on the dimer? The trimer (2-1) was neither stable and its RMSD was about 20 Å after 15 ns simulation. However, the RMSD of trimer (3-0) was about 2.5 Å. The average free energy of trimer (3-0) and (2-1) was calculated with MMPBSA [34]. The average energy was  $-677.70 \pm 13.73$  kcal/mol for trimer (3-0) and

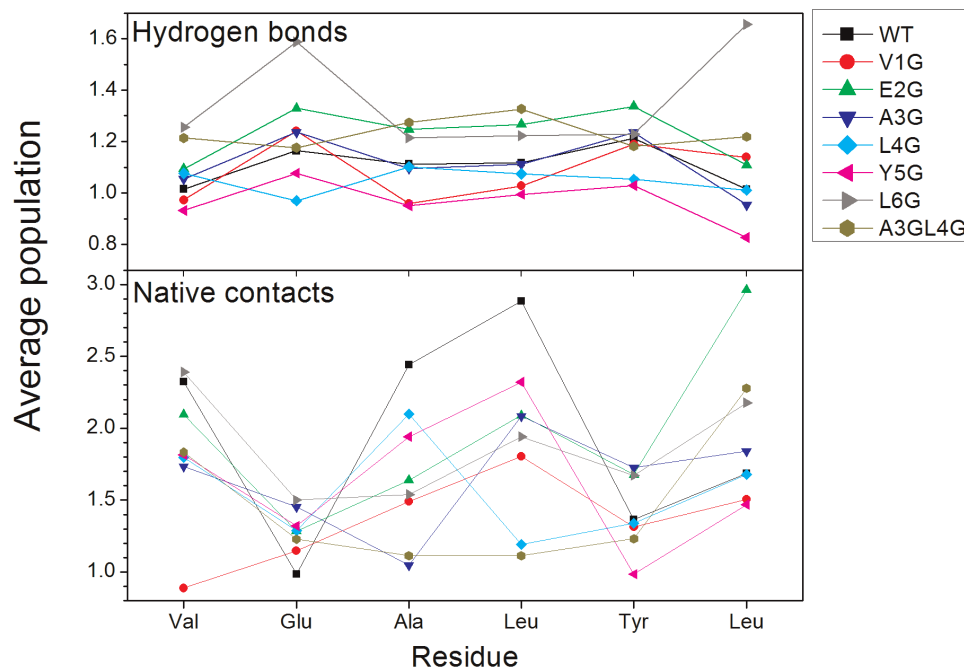

**Figure 7. The average number of native contact and hydrogen bond for each residue of wild type and mutants.** doi:10.1371/journal.pone.0036382.g007

$-657.31 \pm 14.64$  kcal/mol for trimer (2-1). The relative energy difference between trimer (3-0) and trimer (2-1) is about  $-20.39$  kcal/mol. This indicates that the trimer (3-0) was a relative stable state to trimer (2-1). *Gsponer et al.* have reported that three-stranded parallel in-register aggregates as nucleus from three peptides simulation in an implicit solvent [35]. For the model system of the tetramer with addition another strand, the stability of tetramer (2-2) was similar to that of trimer (2-1). Their RMSDs were about 20 Å. This suggests that tetramer(2-3) and trimer (2-1) are unstable. The RMSD of pentamer (3-2) was similar to that of wild type, indicating that the pentamer (3-2) is a stable state. Experimental observation also confirms this point [5]. The residue fluctuation of these oligomers was shown in supplement Figure S4. The fluctuations of trimer (3-0) and pentamer (3-2) were the smallest among these oligomers. The average native contacts and hydrogen bonds for these oligomers were shown in Figure 8. The average number of hydrogen bond for trimer (3-0), pentamer (3-2), and hexamer(3-3) was the largest among these oligomers. The result was consistent with the result of RMSF. According to their stabilities, the intermediate states should be trimer (3-0) and pentamer (3-2). This is in agreement with the other research that pentamer(3-2) and trimer (3-0) may serve as a minimal nucleus seed for the formation of the VEALYL fibrils [29]. Collins *et al* report that fibers grow by monomer addition [36]. For tetramer (3-1), it also has large average values of hydrogen bond and native contacts. This suggests that the aggregation of pentamer (3-2) might be through tetramer (3-1) and trimer(3-0).

## Methods

### 1. The definition of oligomer

The initial atomic coordinates of VEALYL hexamer were constructed from crystal structure 2OMQ using the symmetry operation  $P21$  [3]. Single point mutation for V1G, E2G, A3G, L4G, Y5G, L6G and two linkage mutant for A3GL4G of hexamer were built with SCWRL3 [37]. For these hexamers, the native

contacts are focused on the interfaces of amyloid fibril and classed into two categories. One is from inter-strands, such as between strands 1 and 2, strands 2 and 3, strands 4 and 5, strands 5 and 6. The other is from inter-sheets, such as between strands 1 and 4, strands 1 and 5, strands 2 and 5, strands 2 and 6, strands 3 and 6 (shown in Figure 1). According to the arrangement of short peptides, there is one possibility for hexamer and pentamer. For tetramer, there are two possibilities, one three strands in one sheet and the fourth on the other sheet, or each two in the same sheet (3-1 *versus* 2-2). For trimer, there are also two possibilities, all three strands belong to one single sheet, or two strands in one sheet and the third on the other sheet (3-0 *versus* 2-1). For dimer, two conformers are defined. Two strands are on one sheet or belonged to different sheets (2-0 *versus* 1-1). The atomic coordinates of these oligomers were constructed and extracted from VEALYL hexamer. The VEALYL dimer, trimer, tetramer, and pentamer models were also shown in Figure 1.

### 2. Molecular dynamics simulation

Hydrogen atoms were added using the LEAP module of AMBER8 [38]. Particle Mesh Ewald (PME) [39] was employed to treat long-range electrostatic interactions with the default set in AMBER8. The wild type of hexamer model was solvated in a truncated octahedron box of 3813 TIP3P water molecules so that the final concentration of the system after equilibration is 98 mM, which is at the upper end of the experimental concentration range for crystallization [3]. Other systems were solvated according to the condition of Table 1. A revised parm99 force field was used for intramolecular interactions [40]. 1000-step steepest descent minimization was performed to relieve any structural clash in the solvated system. The SHAKE algorithm [41] was employed to constrain bonds involving hydrogen atoms so that a 2 fs time step was used. The minimized system was heated up and equilibrated in the NVT ensemble at 298K with PMEMD of AMBER8. Langevin dynamics was used in the heat

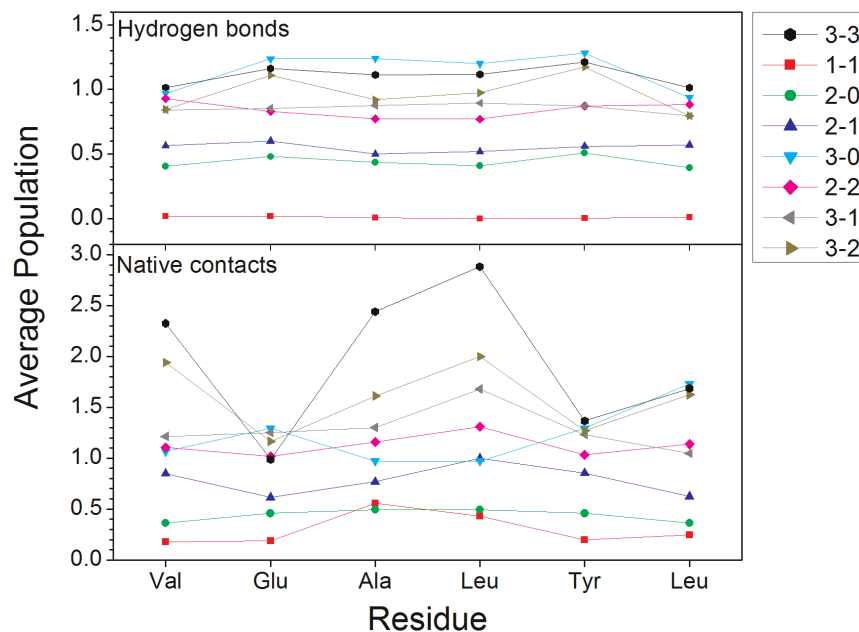

**Figure 8. Average number of native contact and hydrogen bond for each residue of oligomer.** Native contact between pairwise residues was calculated, then added according to the residue number of normalized peptides, and divided by the number of peptide. Hydrogen bond was calculated, then added according to the residue number of normalized peptides, and divided by the number of peptide. doi:10.1371/journal.pone.0036382.g008

**Table 1.** Simulation condition of wild type and mutant for VEALYL peptides.

| Type     | Monomer sequence | strand/sheet organization | counter ions | water | trajectory | Time(ns) |
|----------|------------------|---------------------------|--------------|-------|------------|----------|
| Oligomer | VEALYL           | Dimer_1_1                 | /            | 1270  | 5          | 100      |
|          | VEALYL           | Dimer_2_0                 | /            | 1270  | 5          | 100      |
|          | VEALYL           | Trimer_2_1                | /            | 1905  | 5          | 100      |
|          | VEALYL           | Trimer_3_0                | /            | 1905  | 5          | 100      |
|          | VEALYL           | Tetramer_2_2              | /            | 2543  | 5          | 100      |
|          | VEALYL           | Tetramer_3_1              | /            | 2543  | 5          | 100      |
|          | VEALYL           | Pentamer_3_2              | /            | 3178  | 5          | 100      |
|          | VEALYL           | Hexamer_3_3               | 6 Na+        | 3813  | 10         | 200      |
| Mutant   | GEALYL(V1G)      | Hexamer_3_3               | /            | 3815  | 5          | 100      |
|          | VGALYL(E2G)      | Hexamer_3_3               | 6 Na+        | 3813  | 5          | 100      |
|          | VEGLYL(A3G)      | Hexamer_3_3               | 6 Na+        | 3811  | 5          | 100      |
|          | VEAGYL(L4G)      | Hexamer_3_3               | 6 Na+        | 3815  | 5          | 100      |
|          | VEALGL(Y5G)      | Hexamer_3_3               | 6 Na+        | 3811  | 5          | 100      |
|          | VEALYG(L6G)      | Hexamer_3_3               | 6 Na+        | 3810  | 5          | 100      |
|          | VEGGYL(A3GL4G)   | Hexamer_3_3               | 6 Na+        | 3811  | 5          | 100      |

doi:10.1371/journal.pone.0036382.t001

and equilibration runs with a friction constant of  $1 \text{ ps}^{-1}$ . Multiple independent trajectories of 20.0 ns each in the NPT ensemble at 298K were then simulated with PMEMD of AMBER8. The protocol is also shown in the literature [30,42,43,44,45,46,47,48,49]. The detail simulation condition was also listed in Table 1. A total of 1.6  $\mu\text{s}$  trajectories were collected, taking about 67,920 CPU hours on the in-house Xeon (1.86 GHz) cluster.

### 3. The definition of stability

The stability of the aggregates was quantified by  $C\alpha$  RMSD. The parameter RMSD provides a measure of the deviation of the aggregate from the initial structure. The structures with  $C\alpha$  RMSD  $> 5 \text{ \AA}$  were visibly disordered and thus were defined as unstable.

### 4. Data analysis

The root mean square fluctuation (RMSF) is a measure of the deviation between the position of certain residue and initial reference position.  $Q_f$  is the fraction of native contact during the simulation. Hydrogen bond is defined that the distance between two polar heavy atoms from different strands are less than  $3.5 \text{ \AA}$ . The native contact is a contact between the side chains of two nonadjacent residues in hexamer's native state when their distance is closer than  $6.5 \text{ \AA}$ . Native contact between pairwise residues was calculated, then added according to the residue number of normalized peptides, and divided by six peptides. Hydrogen bond was calculated, then added according to the residue number of normalized peptides, and divided by six peptides.

## References

- Dobson CM (1999) Protein misfolding, evolution and disease. *Trends Biochem Sci* 24: 329–332.
- Chebaro Y, Derreumaux P (2009) Targeting the early steps of Abeta16–22 protofibril disassembly by N-methylated inhibitors: a numerical study. *Proteins* 75: 442–452.
- Sawaya MR, Sambashivan S, Nelson R, Ivanova MI, Sievers SA, et al. (2007) Atomic structures of amyloid cross-beta spines reveal varied steric zippers. *Nature* 447: 453–457.
- Chen J, Armstrong AH, Koehler AN, Hecht MH (2010) Small molecule microarrays enable the discovery of compounds that bind the Alzheimer's Abeta peptide and reduce its cytotoxicity. *J Am Chem Soc* 132: 17015–17022.
- Bleicholder C, Dupuis NF, Wyttenbach T, Bowers MT (2011) Ion mobility-mass spectrometry reveals a conformational conversion from random assembly to beta-sheet in amyloid fibril formation. *Nat Chem* 3: 172–177.
- Ono K, Yamada M (2011) Low-n oligomers as therapeutic targets of Alzheimer's disease. *J Neurochem* 117: 19–28.

The free energies of molecules in solution were calculated with MM-PBSA [34].

## Supporting Information

**Figure S1  $C\alpha$  RMSD of VEALYL hexamer for representative trajectory during 20 ns simulation.**

(TIF)

**Figure S2 The average  $C\alpha$  RMSF for wild type and mutants. The RMSF of V1G was the highest among these mutants.**

(TIF)

**Figure S3  $C\alpha$  RMSD of eight VEALYL oligomers versus simulation time.**

(TIF)

**Figure S4 The average  $C\alpha$  variation of residues for each oligomer.**

(TIF)

## Acknowledgments

We thank Professor A. Zhu from University of Cambridge for assistance in writing and for critical reading of the manuscript.

## Author Contributions

Conceived and designed the experiments: HC. Performed the experiments: WY YC. Analyzed the data: WY YC WW QY HC. Contributed reagents/materials/analysis tools: WY YC. Wrote the paper: HC YL JZ.

7. Straub JE, Thirumalai D (2011) Toward a molecular theory of early and late events in monomer to amyloid fibril formation. *Annu Rev Phys Chem* 62: 437–463.
8. Liu G, Prabhakar A, Aucoin D, Simon M, Sparks S, et al. (2010) Mechanistic studies of peptide self-assembly: transient  $\alpha$ -helices to stable  $\beta$ -sheets. *J Am Chem Soc* 132: 18223–18232.
9. Berryman JT, Radford SE, Harris SA (2011) Systematic examination of polymorphism in amyloid fibrils by molecular-dynamics simulation. *Biophys J* 100: 2234–2242.
10. Boucher G, Mousseau N, Derreumaux P (2006) Aggregating the amyloid Abeta(11–25) peptide into a four-stranded  $\beta$ -sheet structure. *Proteins* 65: 877–888.
11. Connelly L, Jang H, Arce FT, Capone R, Kotler SA, et al. (2012) Atomic force microscopy and MD simulations reveal pore-like structures of all-D-enantiomer of Alzheimer's beta-amyloid peptide: relevance to the ion channel mechanism of AD pathology. *J Phys Chem B* 116: 1728–1735.
12. DeMarco ML, Daggett V (2004) From conversion to aggregation: protofibril formation of the prion protein. *Proc Natl Acad Sci U S A* 101: 2293–2298.
13. Derreumaux P, Mousseau N (2007) Coarse-grained protein molecular dynamics simulations. *J Chem Phys* 126: 025101.
14. Gnanakaran S, Nussinov R, Garcia AE (2006) Atomic-level description of amyloid beta-dimer formation. *J Am Chem Soc* 128: 2158–2159.
15. Kent A, Jha AK, Fitzgerald JE, Freed KF (2008) Benchmarking implicit solvent folding simulations of the amyloid beta(10–35) fragment. *J Phys Chem B* 112: 6175–6186.
16. Lippert J, Franklin J, Wu F, Doniach S (2005) Protein misfolding and amyloid formation for the peptide GNNQQNY from yeast prion protein Sup35: simulation by reaction path annealing. *J Mol Biol* 349: 648–658.
17. Miller Y, Ma B, Nussinov R (2009) Polymorphism of Alzheimer's Abeta17–42 (p3) oligomers: the importance of the turn location and its conformation. *Biophys J* 97: 1168–1177.
18. Miller Y, Ma B, Nussinov R (2010) The unique Alzheimer's beta-amyloid triangular fibril has a cavity along the fibril axis under physiological conditions. *J Am Chem Soc* 133: 2742–2748.
19. Miller Y, Ma B, Tsai CJ, Nussinov R (2010) Hollow core of Alzheimer's Abeta42 amyloid observed by cryoEM is relevant at physiological pH. *Proc Natl Acad Sci U S A* 107: 14128–14133.
20. Nguyen HD, Hall CK (2004) Molecular dynamics simulations of spontaneous fibril formation by random-coil peptides. *Proc Natl Acad Sci U S A* 101: 16180–16185.
21. Reddy G, Straub JE, Thirumalai D (2010) Dry amyloid fibril assembly in a yeast prion peptide is mediated by long-lived structures containing water wires. *Proc Natl Acad Sci U S A* 107: 21459–21464.
22. Wu C, Bowers MT, Shea JE (2011) On the Origin of the Stronger Binding of PIB over Thioflavin T to Protofibrils of the Alzheimer Amyloid-beta Peptide: A Molecular Dynamics Study. *Biophys J* 100: 1316–1324.
23. Zheng J, Jang H, Nussinov R (2008) Beta2-microglobulin amyloid fragment organization and morphology and its comparison to Abeta suggests that amyloid aggregation pathways are sequence specific. *Biochemistry* 47: 2497–2509.
24. Toschi F, Lugli F, Biscarini F, Zerbetto F (2009) Effects of electric field stress on a beta-amyloid peptide. *J Phys Chem B* 113: 369–376.
25. Masman MF, Eisel UL, Cszimadia IG, Penke B, Enriz RD, et al. (2009) In silico study of full-length amyloid beta 1–42 tri- and penta-oligomers in solution. *J Phys Chem B* 113: 11710–11719.
26. Zheng J, Ma B, Chang Y, Nussinov R (2008) Molecular dynamics simulations of Alzheimer Abeta40 elongation and lateral association. *Front Biosci* 13: 3919–3930.
27. Sgourakis NG, Yan Y, McCallum SA, Wang C, Garcia AE (2007) The Alzheimer's peptides Abeta40 and 42 adopt distinct conformations in water: a combined MD/NMR study. *J Mol Biol* 368: 1448–1457.
28. Wang J, Tan C, Chen HF, Luo R (2008) All-atom computer simulations of amyloid fibrils disaggregation. *Biophys J* 95: 5037–5047.
29. Lin YF, Zhao JH, Liu HL, Liu KT, Chen JT, et al. (2010) Structural stability and aggregation behavior of the VEALYL peptide derived from human insulin: a molecular dynamics simulation study. *Biopolymers* 94: 269–278.
30. Chen Y, He YJ, Wu M, Yan G, Li Y, et al. (2010) Insight into the stability of cross-beta amyloid fibril from molecular dynamics simulation. *Biopolymers* 93: 578–586.
31. Day R, Daggett V (2005) Ensemble versus single-molecule protein unfolding. *Proc Natl Acad Sci U S A* 102: 13445–13450.
32. Zheng J, Ma B, Tsai CJ, Nussinov R (2006) Structural stability and dynamics of an amyloid-forming peptide GNNQQNY from the yeast prion sup-35. *Biophys J* 91: 824–833.
33. Esposito L, Pedone C, Vitagliano L (2006) Molecular dynamics analyses of cross-beta-spine steric zipper models: beta-sheet twisting and aggregation. *Proc Natl Acad Sci U S A* 103: 11533–11538.
34. Luo R, David L, Gilson MK (2002) Accelerated Poisson-Boltzmann calculations for static and dynamic systems. *J Comput Chem* 23: 1244–1253.
35. Gsponer J, Haberthur U, Caffisch A (2003) The role of side-chain interactions in the early steps of aggregation: Molecular dynamics simulations of an amyloid-forming peptide from the yeast prion Sup35. *Proc Natl Acad Sci U S A* 100: 5154–5159.
36. Collins SR, Douglass A, Vale RD, Weissman JS (2004) Mechanism of prion propagation: amyloid growth occurs by monomer addition. *PLoS Biol* 2: e321.
37. Canutescu AA, Shelenkov AA, Dunbrack RL Jr. (2003) A graph-theory algorithm for rapid protein side-chain prediction. *Protein Sci* 12: 2001–2014.
38. Case DA, Darden TA, Cheatham TE, Simmerling III CL, Wang J, et al. (2004) AMBER 8. University of California, San Francisco.
39. Darden T, York D, Pedersen, L (1993) Particle mesh Ewald: an  $N \log(N)$  method for Ewald sums in large systems. *J Chem Phys* 98: 10089–10092.
40. Lwin TZ, Luo R (2006) Force field influences in beta-hairpin folding simulations. *Protein Sci* 15: 2642–2655.
41. Rychaert JP, Cicotti, G., Berendsen, J. C H (1977) Numerical integration of Cartesian equations of motion of a system with constraints: molecular dynamics of n-alkanes. *Comput Phys* 23: 327–341.
42. Chen HF (2009) Aggregation mechanism investigation of the GIFQINS cross-beta amyloid fibril. *Comput Biol Chem* 33: 41–45.
43. Chen HF (2008) Mechanism of Coupled Folding and Binding in the siRNA-PAZ Complex. *J Chem Theory Comput* 4: 1360–1368.
44. Chen HF (2009) Molecular dynamics simulation of phosphorylated KID post-translational modification. *PLoS One* 4: e6516.
45. Chen HF, Luo R (2007) Binding induced folding in p53-MDM2 complex. *J Am Chem Soc* 129: 2930–2937.
46. Qin F, Chen Y, Li YX, Chen HF (2009) Induced Fit of mRNA-TIS11D Complex. *J Chem Physics* 131: 115103.
47. Qin F, Chen Y, Wu M, Li Y, Zhang J, et al. (2010) Induced fit or conformational selection for RNA/U1A folding. *Rna* 16: 1053–1061.
48. Qin F, Jiang Y, Chen Y, Wu M, Yan G, et al. (2011) Conformational selection or induced fit for Brinker and DNA recognition. *Phys Chem Chem Phys* 13: 1407–1412.
49. Qin F, Ye W, Chen Y, Chen X, Li Y, et al. (2012) Specific recognition between intrinsically disordered LEF and DNA. *Phys Chem Chem Phys* 14: 538–545.
